# Supplementary material
Source: publisher figshare collection journal article supplement (https://brill.figshare.com/articles/dataset/_/16729021)
Supplement: Supplementary file 1 [file 1]

# **Functional morphology and phylogenetic significance of the forewing base structure in Ensifera (Orthoptera)**

**Mamoru Takahashi and Kazunori Yoshizawa\*,\*\***

Systematic Entomology, School of Agriculture, Hokkaido University, Sapporo 060-8589, Japan

\*Corresponding author, e-mail: [psocid@res.agr.hokudai.ac.jp](mailto:psocid@res.agr.hokudai.ac.jp)

\*\*ORCID: 0000-0001-6170-4296

## **Supplementary material**

**Supplementary data matrix.** Nexus formatted data matrix used for the present study, including tree files obtained from the parsimony analysis.
